# Supplementary material
Source: PubMed Central journal article supplement (PMC6713273)
Supplement: NIHMS1532314-supplement-2.pdf [file NIHMS1532314-supplement-2.pdf]

**Supplemental Table 2:** Pearson product moment correlation coefficients for relationships between TMS-evoked IPC and ipsilateral cortical silent period measures versus measures of clinical function in participants post-stroke.

| Condition                                 | UE-FM | p     | Grip Strength | p     | WMFT  | p     | NHPT Rate | p     |
|-------------------------------------------|-------|-------|---------------|-------|-------|-------|-----------|-------|
| <i>Post TMS-evoked coherence</i>          |       |       |               |       |       |       |           |       |
| Active iM1                                | -.74* | .0002 | -.68*         | .0009 | -.61* | .0045 | -.44      | .1100 |
| Active cM1                                | .15   | .5400 | 0.52*         | .022  | .11   | .6540 | -0.35     | .2410 |
| <i>Pre TMS-evoked coherence</i>           |       |       |               |       |       |       |           |       |
| Active iM1                                | -.53* | .0195 | -.43          | .0661 | -.40  | .0897 | -.02      | .9372 |
| Active cM1                                | .26   | .2974 | .47           | .0510 | .19   | .4502 | .07       | .7825 |
| <i>Ipsilateral Silent Period Duration</i> |       |       |               |       |       |       |           |       |
| Active iM1                                | -.02  | .94   | .22           | .41   | .14   | .60   | -.45      | .11   |
| Active cM1                                | -.19  | .52   | -.31          | .29   | -.26  | .31   | -.62*     | .03   |

*Active iM1: condition of TMS delivery to ipsilesional M1 during nonparetic APB muscle contraction; Active cM1: condition of TMS delivery to contralesional M1 during paretic APB muscle contraction. \* denotes significant relationship ( $p < 0.05$ ).*
